# Supplementary material for: Interleukin-30 Promotes Breast Cancer Growth and Progression
Source: Oxford University Press journal article supplement (doi:10.1158/0008-5472.can-16-0189), 2016-08-22
Supplement: 00085472can160189-sup-161236_1_supp_0_sc0ss0.doc [file 00085472can160189-sup-161236_1_supp_0_sc0ss0.doc]

**Supplementary Table S1.** Antibodies used in immunostaining.

| **Antibody** | **Clone** | **Origin** | **Source** |
| --- | --- | --- | --- |
|  |  |  |  |
| ***Anti-human Abs*** |  |  |  |
| Ki-67 | MIB-1 | Mouse | Dako, Glostrup, DK |
| CD11b | EP1345Y | Rabbit | Abcam, Cambridge, UK |
| CD14 | 7 | Mouse | Leica Biosystems, Newcastle Upon Tyne, UK |
| CD33 | PWS44 | Mouse | Leica Biosystems |
| CXCL1 |  | Rabbit | Abcam |
| CD68 | PG-M1 | Mouse | Dako |
| COX2 | CX229 | Mouse | Cayman Chemical, Ann Arbor, MI, USA |
| CSF1 | 2D10 | Mouse | LifeSpan Biosciences, Inc., Seattle, WA |
| EGF |  | Rabbit | Santa Cruz Biotechnology |
| ER | 6F11 | Mouse | Leica Biosystems |
| HER2 (Hercept Test) |  | Rabbit | Dako |
| IL-1 |  | Goat | Santa Cruz Biotechnology |
| IL-6 | 1.2-2B11-2G10 | Mouse | Abcam |
| IL-8 |  | Rabbit | Invitrogen, Camarillo, CA, USA |
| KISS1 | IF7 | Mouse | Sigma-Aldrich, Saint Louis, MO, USA |
| PECAM1 | 1A10 | Mouse | Leica Biosystems |
| Phospho STAT1 | 58D6 | Rabbit | Cell Signaling Technology, Danvers, MA, USA |
| Phospho STAT3 | 3E2 | Mouse | Cell Signaling Technology |
| PR | 16 | Mouse | Leica Biosystems |
| PTEN | 28H6 | Mouse | YLEM, Rome, Italy |
| SHH | EP1190Y | Rabbit | Abcam |
| TP73 | EP436Y | Rabbit | Abcam |
| VEGF-A |  | Rabbit | Santa Cruz Biotechnology |
|  |  |  |  |
| ***Anti-mouse Abs*** |  |  |  |
| CD11b | EPR1344 | Rabbit | Abcam |
| Laminin |  | Rabbit | Biogenex, Fremont, CA, USA |
| Collagen type IV |  | Rabbit | Merck Millipore, Billerica, MA, USA |
| Gr-1a | RB6-8C5 | Rat | ATCC, Manassas, VA, USA |
| Ly-6gb | 1A8 | Rat | BioLegend, San Diego, CA, USA |
| Mac-1b | M1/70.5 | Rat | Harlan Sera-lab, Crawley Down, UK |
| Asialo GM1 |  | Rabbit | Wako Pure Chemical Industries, Richmond, VA, USA |
| PECAM1 | SZ31 | Rat | Dianova, Hamburg, D |
| PECAM1b | mEC-13.324 | Rat | Dr. A Vecchi, M. Negri Institute, Milan, Italy |
|  |  |  |  |

1. The anti-granulocyte receptor-1 (Gr-1) mAb, RB6-8C5, binds to Ly6G, which is present on neutrophils, and to Ly6C, which is expressed on neutrophils, dendritic cells, and subpopulations of lymphocytes and monocytes (1).
2. Antibodies used on frozen sections.

**Supplementary Table S2.** Characteristics and outcomes by levels of IL-30 expression in tumor cells (primary tumor).

|  | **IL30 expression** | | | |  |
| --- | --- | --- | --- | --- | --- |
|  | **Negative**  **(n=42)** | **Weakly positive**  **(n=71)** | **Positive**  **(n=43)** | **Weakly positive**  **or positive (n=114)** | ***p*a** |
|  |  |  |  |  |  |
| ***Mean age in years (SD)*** | 58.2 (11.8) | 58.7 (10.9) | 60.5 (12.3) | 59.4 (11.4) |  |
|  |  |  |  |  |  |
| ***Histotypes, %*** |  |  |  |  |  |
| - Ductal carcinoma | 21.0 | 41.9 | 37.1 | 79.0 |  |
| - Lobular carcinoma | 42.3 | 50.0 | 7.7 | 57.7 |  |
| - Others | 26.5 | 47.1 | 26.5 | 73.5 |  |
|  |  |  |  |  |  |
| ***Molecular classes, %*** |  |  |  |  |  |
| - Luminal A | 38.8 | 38.8 | 22.4 | 61.2 |  |
| - Luminal B | 30.4 | 37.5 | 32.1 | 69.6 |  |
| - HER2+ | 10.7 | 50.0 | 39.3 | 89.3 | *<0.05b* |
| - Triple negative | 13.0 | 73.9 | 13.0 | 87.0 | *<0.05b* |
|  |  |  |  |  |  |
| ***HER2 expression, %*** |  |  |  |  | *<0.05* |
| - HER2− | 32.1 | 50.0 | 17.9 | 67.9 |  |
| - HER2+ | 16.0 | 36.0 | 48.0 | 84.0 |  |
|  |  |  |  |  |  |
| ***Stage, %*** |  |  |  |  |  |
| - IA | 20.3 | 52.5 | 27.1 | 79.7 |  |
| - IIA or IIB | 36.4 | 36.4 | 27.3 | 63.6 |  |
| - IIIA or IIIB or IIIC | 26.4 | 45.3 | 28.3 | 73.6 |  |
|  |  |  |  |  |  |
| ***Lymph node metastases, %*** |  |  |  |  |  |
| - No | 28.0 | 45.3 | 26.7 | 72.0 |  |
| - Yes | 25.9 | 45.7 | 28.4 | 74.1 |  |
|  |  |  |  |  |  |
| ***Outcomes*** |  |  |  |  |  |
| ***Mean follow-up duration in years (SD)*** | 6.1 (2.4) | 6.9 (2.6) | 7.3 (2.3) | 7.1 (2.5) |  |
|  |  |  |  |  |  |
| ***Cancer recurrence, %*** |  |  |  |  |  |
| - No | 26.0 | 47.0 | 27.0 | 74.0 |  |
| - Yes | 28.6 | 42.9 | 28.6 | 71.4 |  |
|  |  |  |  |  |  |
| ***Death, %*** |  |  |  |  |  |
| - No | 25.4 | 46.5 | 28.1 | 74.6 |  |
| - Yes | 30.9 | 42.9 | 26.2 | 69.1 |  |
|  |  |  |  |  |  |

1. Fisher exact test for categorical variables; t-test for continuous ones.
2. *Versus* Luminal A.

Non-significant *p*-values have not been reported.

**Supplementary Table S3.** Characteristics and outcomes by levels of IL-30 expression in leukocytes infiltrating the primary tumor.

|  | **IL30 expression** | | | |  |
| --- | --- | --- | --- | --- | --- |
|  | **Scanty**  **(n=83)** | **Distinct**  **(n=53)** | **Strong**  **(n=20)** | **Distinct or**  **strong (n=73)** | ***p*a** |
|  |  |  |  |  |  |
| ***Mean age in years (SD)*** | 60.3 (10.5) | 56.4 (12.2) | 60.9 (13.0) | 57.6 (12.5) |  |
|  |  |  |  |  |  |
| ***Histotypes, %*** |  |  |  |  |  |
| - Ductal carcinoma | 51.61 | 35.5 | 12.90 | 48.4 |  |
| - Lobular carcinoma | 53.9 | 38.5 | 7.7 | 46.2 |  |
| - Others | 54.4 | 30.9 | 14.7 | 45.6 |  |
|  |  |  |  |  |  |
| ***Molecular classes, %*** |  |  |  |  |  |
| - Luminal A | 69.4 | 14.3 | 16.3 | 30.6 |  |
| - Luminal B | 55.4 | 33.9 | 10.7 | 44.6 |  |
| - HER2+ | 35.7 | 57.1 | 7.1 | 64.3 | *<0.05b* |
| - Triple negative | 34.8 | 47.8 | 17.4 | 65.2 | *<0.05b* |
|  |  |  |  |  |  |
| ***HER2 expression, %*** |  |  |  |  |  |
| - HER2− | 57.6 | 29.3 | 13.2 | 42.5 |  |
| - HER2+ | 44.0 | 44.0 | 12.00 | 56.0 |  |
|  |  |  |  |  |  |
| ***Stage, %*** |  |  |  |  |  |
| - IA | 67.8 | 25.4 | 6.8 | 32.2 |  |
| - IIA or IIB | 47.7 | 36.4 | 15.9 | 52.3 | *<0.05c* |
| - IIIA or IIIB or IIIC | 41.5 | 41.5 | 17.0 | 58.5 | *<0.05c* |
|  |  |  |  |  |  |
| ***Lymph node metastases, %*** |  |  |  |  | *<0.001* |
| - No | 68.00 | 25.3 | 6.7 | 32.0 |  |
| - Yes | 39.5 | 42.0 | 18.5 | 60.5 |  |
|  |  |  |  |  |  |
| ***Outcomes*** |  |  |  |  |  |
| ***Mean follow-up duration in years (SD)*** | 7.3 (2.1) | 6.3 (2.5) | 6.0 (3.5) | 6.3 (2.8) |  |
|  |  |  |  |  |  |
| ***Cancer recurrence, %*** |  |  |  |  |  |
| - No | 58.0 | 31.0 | 11.0 | 42.0 |  |
| - Yes | 44.6 | 39.3 | 16.1 | 55.4 |  |
|  |  |  |  |  |  |
| ***Death, %*** |  |  |  |  |  |
| - No | 57.9 | 30.7 | 11.4 | 42.1 |  |
| - Yes | 40.5 | 42.9 | 16.7 | 59.5 |  |
|  |  |  |  |  |  |

1. Fisher exact test for categorical variables; t-test for continuous ones.
2. *Versus* Luminal A.
3. *Versus* Stage IA.

Non-significant *p*-values have not been reported.

**Supplementary Table S4.** Multivariable regression models evaluating the association between cancer stage at baseline and IL-30 expression levels.

| **Variables** | **Crude coefficient**  **(95% CI)** | ***p*a** | **Adjusted Coefficient**  **(95% CI)** | ***p*a** |
| --- | --- | --- | --- | --- |
|  |  |  |  |  |
| ***Age, 1-year increase*** | 0.008 (-0.004; 0.019) | *0.2* | 0.008 (-0.004; 0.020) | *0.2* |
|  |  |  |  |  |
| ***Histotypes, %*** |  |  |  |  |
| - Ductal carcinoma | 1 (ref. cat.) | *--* | 1 (ref. cat.) | *--* |
| - Lobular carcinoma | 0.026 (-0.368; 0.420) | *0.9* | 0.034 (-0.381; 0.449) | *0.9* |
| - Others | 0.049 (-0.246; 0.346) | *0.7* | 0.015 (-0.293; 0.322) | *0.9* |
|  |  |  |  |  |
| ***HER2+ molecular class*** | -0.033 (-0.320; 0.257) | *0.8* | -0.028 (-0.341; 0.284) | *0.8* |
|  |  |  |  |  |
| ***IL-30 expression in tumor***  ***cells (primary tumor)*** |  |  |  |  |
| - Negative | 1 (ref. cat.) | *--* | 1 (ref. cat.) | *--* |
| - Weakly positive | -0.146 (-0.474; 0.182) | *0.4* | -0.146 (-0.478; 0.186) | *0.4* |
| - Positive | -0.071 (-0.436; 0.294) | *0.7* | -0.071 (-0.464; 0.322) | *0.7* |
|  |  |  |  |  |
| ***IL-30 expression in infiltrating***  ***leukocytes (primary tumor)*** |  |  |  |  |
| - Scanty | 1 (ref. cat.) | *--* | 1 (ref. cat.) | *--* |
| - Distinct | 0.348 (0.059; 0.638) | *0.018* | 0.398 (0.101; 0.695) | *0.009* |
| - Strong | 0.467 (0.057; 0.876) | *0.026* | 0.467 (0.055; 0.878) | *0.027* |
|  |  |  |  |  |
| ***IL-30 expression in infiltrating***  ***leukocytes (lymph nodes)*** |  |  |  |  |
| - Scanty | 1 (ref. cat.) | *--* | 1 (ref. cat.) | *--* |
| - Distinct | 0.466 (0.182; 0.751) | *<0.001* | 0.464 (0.164; 0.764) | *0.003* |
| - Strong | 0.904 (0.595; 1.212) | *<0.001* | 0.917 (0.599; 1.235) | *<0.001* |
|  |  |  |  |  |

1. Random-effect linear regression analysis including 156 observations. All recorded variables were forcedly entered, with the exception of lymph node metastasis, which was collinear with stage. Three different models were fit, each including one of the three IL-30 variables (IL-30 expression in tumor cells of the primary tumor, IL-30 expression in leukocytes infiltrating the primary tumor, IL-30 expression in leukocytes infiltrating lymph nodes), with all other covariates remaining stable. In all models, IL-30 was included as dummy variable.

Abbreviations: CI = Confidence Interval. Ref. cat. = reference category.

**References**

1. Daley JM, Thomay AA, Connolly MD, Reichner JS, Albina JE. Use of Ly6G-specific monoclonal antibody to deplete neutrophils in mice. J Leukoc Biol 2008;83:64-70.
